# Supplementary material
Source: Springer Nature journal article supplement (https://www.springermedizin.de/resource/supplementary/12889_2009_1858_MOESM2_ESM.pdf/9504204)
Supplement: MOESM2 [file 9504204]

Patients aged over 30 years  
attending Hospital Diabetes  
Clinic in previous 3 years  
(n=4311)

Random sample of 703 patients  
with Type 2 Diabetes sent  
questionnaires

**607 eligible patients**

Returned and  
excluded (died,  
moved address)  
(n=96)

**Non-respondents**  
(n=310)

**Respondents**  
(n=297)

**188 families returned relative  
questionnaires from  
respondents**

69 family members  
returned relative's  
questionnaire

107 families  
returned two  
relative's  
questionnaires  
(n=214)

81 families returned  
one relative's  
questionnaire (n=81)

**Relatives from 257 families  
returned questionnaires  
(257/607 – 42% response rate)**

**Completed questionnaires  
n=364**
